# Supplementary material for: Mammalian MT1 and MT2 metallothioneins differ in their metal binding abilities
Source: Royal Society of Chemistry journal article supplement (doi:10.1039/c3mt00123g), 2013-01-01

## Supplementary material for the manuscript:

### Mammalian MT1 and MT2 metallothioneins differ in their metal binding abilities

Ester Artells<sup>1,2,#</sup>, Oscar Palacios<sup>1</sup>, Mercè Capdevila<sup>1</sup>, Sílvia Atrian<sup>2</sup>

**Material and Methods.** Detailed information of the experimental methodology indicated in the main text.

**Figure S1.** Deconvoluted ESI-MS spectra corresponding to the titration of a 10  $\mu$ M solution of the Zn-mMT2 preparation with Cu(I) carried out at neutral pH and analyzed at both, neutral and acidic pH.

**Figure S2.** Deconvoluted ESI-MS spectra corresponding to the titration with Cu(I) of (A) a 20  $\mu$ M solution of Zn<sub>4</sub>- $\alpha$ mMT2 and (B) a 20  $\mu$ M solution of Zn<sub>3</sub>- $\beta$ mMT2, both carried out at neutral pH and analyzed at neutral and acidic pH.

## Material and Methods

**Synthesis and purification of the recombinant metal-MT complexes.** To overexpress MT, the recombinant constructs were introduced into the protease deficient strain *E.coli* BL21. Overnight cultures of the transformed host strains in LB supplemented with 100 mg l<sup>-1</sup> ampicillin at 37 °C were inoculated to 1.5 L of fresh LB medium. After growth at 37 °C to an A600 value of 1.0, protein synthesis was induced with 100 mM IPTG (isopropyl-β-D-thiogalactopyranoside) final concentration, 30 min before the addition of the desired metal salt solution (300 μM ZnCl<sub>2</sub>, 300 μM CdCl<sub>2</sub>, or 500 μM CuSO<sub>4</sub>, final concentration). Copper cultures were performed under two aeration conditions: normal or regular aeration (1-L culture in 2.5-L Erlenmeyer flasks at 220 rpm agitation), and low aeration (1.5-L culture in 2.5-L Erlenmeyer flasks at 150 rpm agitation). Bacterial growth was allowed for an additional 2.5 h and then the cell biomass was harvested and washed in PBS (phosphate-buffered saline, 1.4 M NaCl, 27 mM KCl, 101 mM Na<sub>2</sub>HPO<sub>4</sub>, 18 mM KH<sub>2</sub>PO<sub>4</sub>) and pelleted by centrifugation at 7700 x g for 10 min. For protein purification, cells were resuspended in 5% of the original volume of ice-cold PBS-0.5% v:v β-mercaptoethanol. To prevent oxidation, pure grade 5.6 argon was bubbled through all the steps of the purification procedure. Suspended cells were sonicated at 4 °C with 20 s pulses for 5 min, and centrifuged at 12000 x g for 30 min. The supernatant was recovered and used to purify the GST-MT and fusion protein by batch affinity chromatography with Glutathione-Sepharose-4B at a volume ratio 1:10 matrix:sample. The mixture was incubated with gentle agitation for 60 min at room temperature. After three washes in PBS, a thrombin-PBS solution (10 units of thrombin/mg of fusion protein) was poured into the matrix bed, and digestion was carried out overnight at 23–25 °C. The GST portion of the expressed fusion protein remained bound to the gel matrix, whereas the MT portion remained in solution together with thrombin. The supernatant was then five-fold concentrated using Centriprep Concentrators (Amicon) with a cutoff of 3 kD, and subsequently fractionated using FPLC. A Superdex-75 exclusion column was equilibrated with 50 mM Tris-HCl, pH 7.0 and run at 1 ml min<sup>-1</sup>. 1 ml fractions were collected and analysed for protein content by their absorbance at 254 and 280 nm. Aliquots of the protein-containing Superdex-75 fractions were analysed by SDS-PAGE on 15% gels and stained with Coomassie Blue. Positive samples were pooled, and aliquots were stored at -70 °C for further use.

### *In vitro* prepared metal-MT complexes:

Metal replacement titrations (Zn/Cd and Zn/Cu) were performed by adding the correspondent metal ions at equivalent molar ratios to the recombinant Zn-MT complexes at pH 7.0 under strict anaerobic conditions. The following solutions were used: CdCl<sub>2</sub> in water, MERCK AAS Cd<sup>2+</sup> standard of 1000 ppm, or Cu<sup>+</sup> ([Cu(CH<sub>3</sub>CN)](ClO<sub>4</sub>) in 30% v/v CH<sub>3</sub>CN/H<sub>2</sub>O).

**Figure S1.** Deconvoluted ESI-MS spectra corresponding to the titration of a 10  $\mu$ M solution of the Zn-mMT2 preparation with Cu(I) carried out at neutral pH and analyzed at both, neutral and acidic pH.

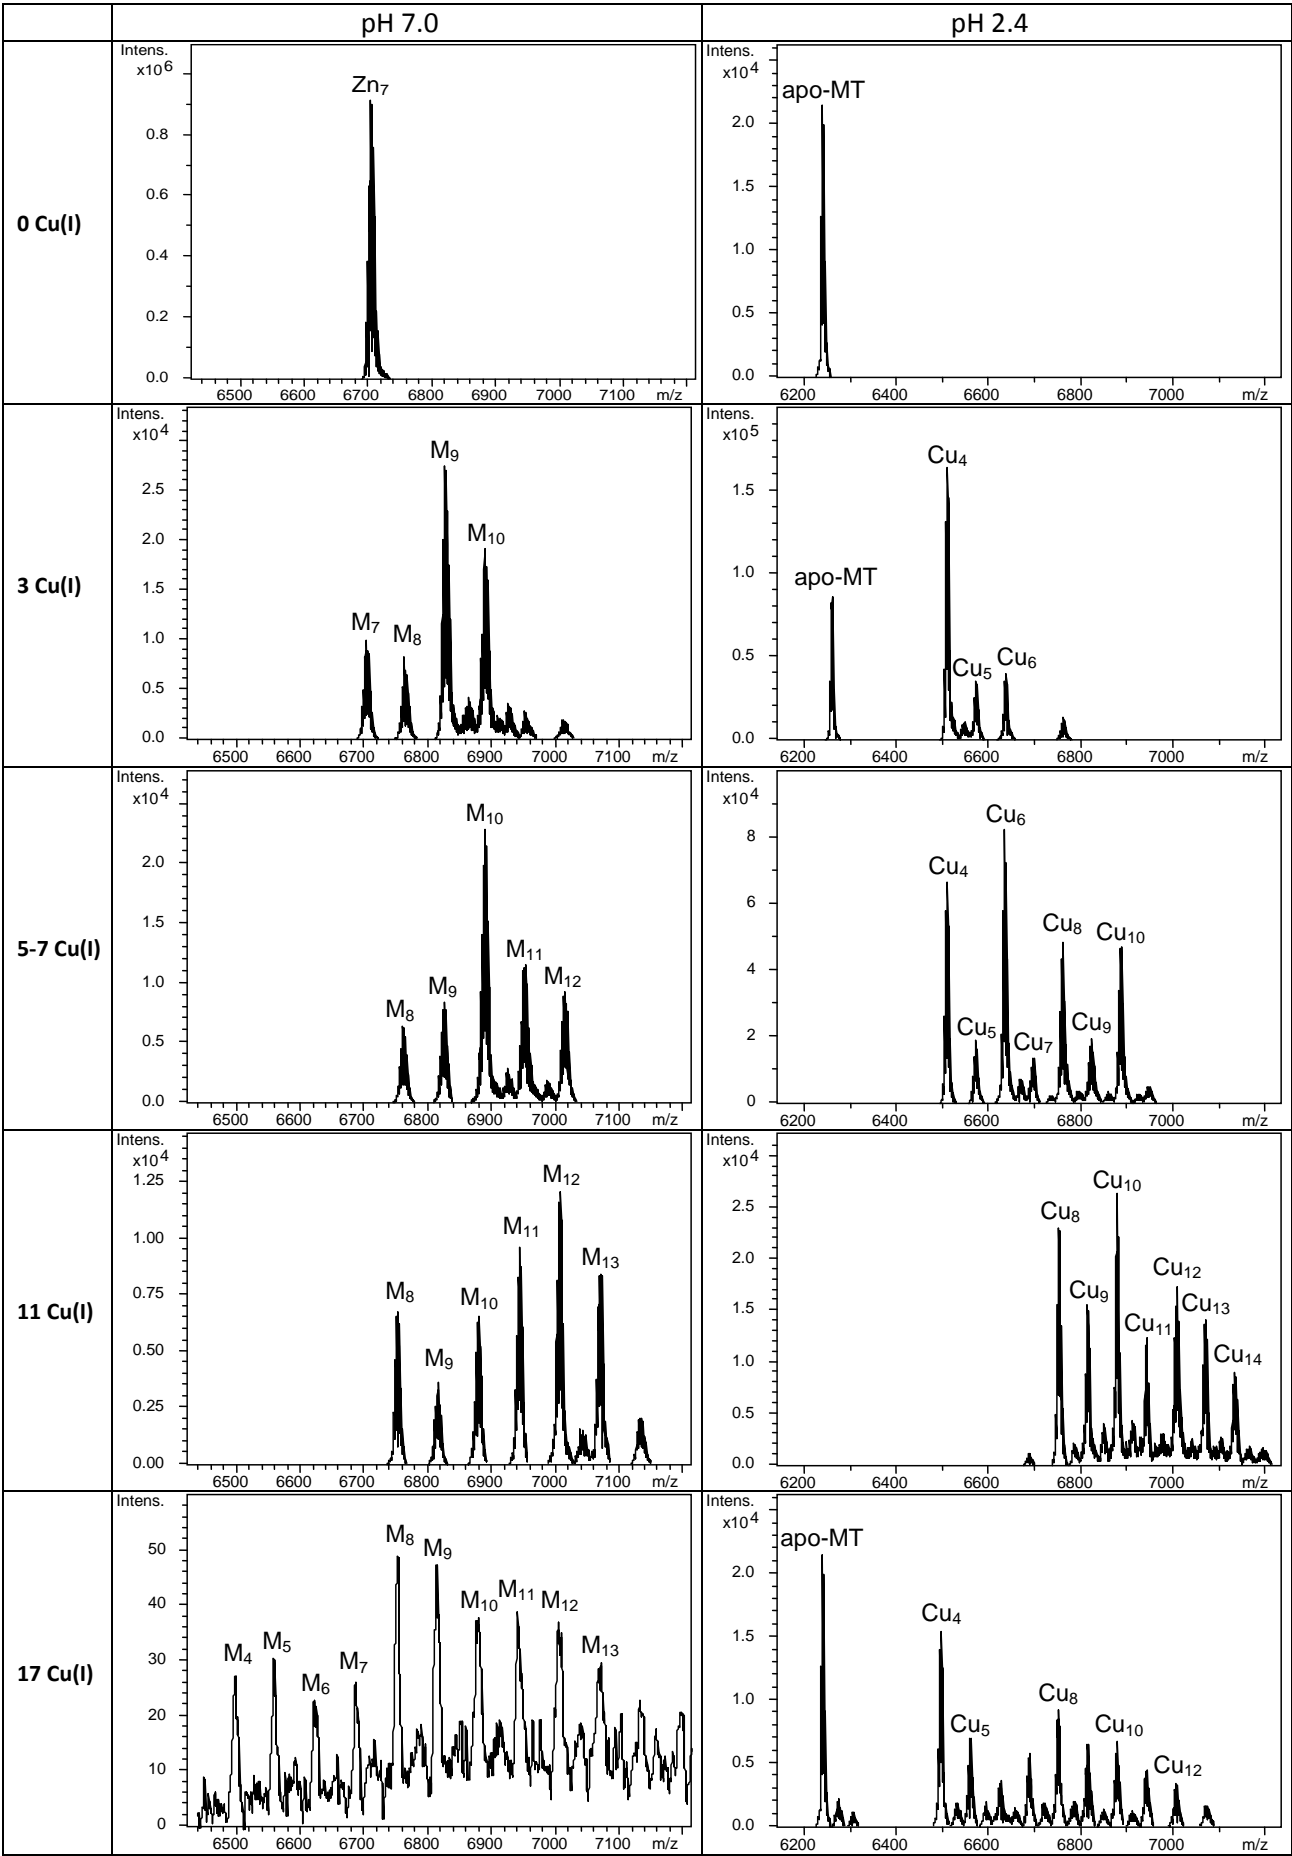

**Figure S2.** Deconvoluted ESI-MS spectra corresponding to the titration with Cu(I) of (A) a 20  $\mu$ M solution of Zn<sub>4</sub>- $\alpha$ MT2 and (B) a 20  $\mu$ M solution of Zn<sub>3</sub>- $\beta$ MT2, both carried out at neutral pH and analyzed at neutral and acidic pH.

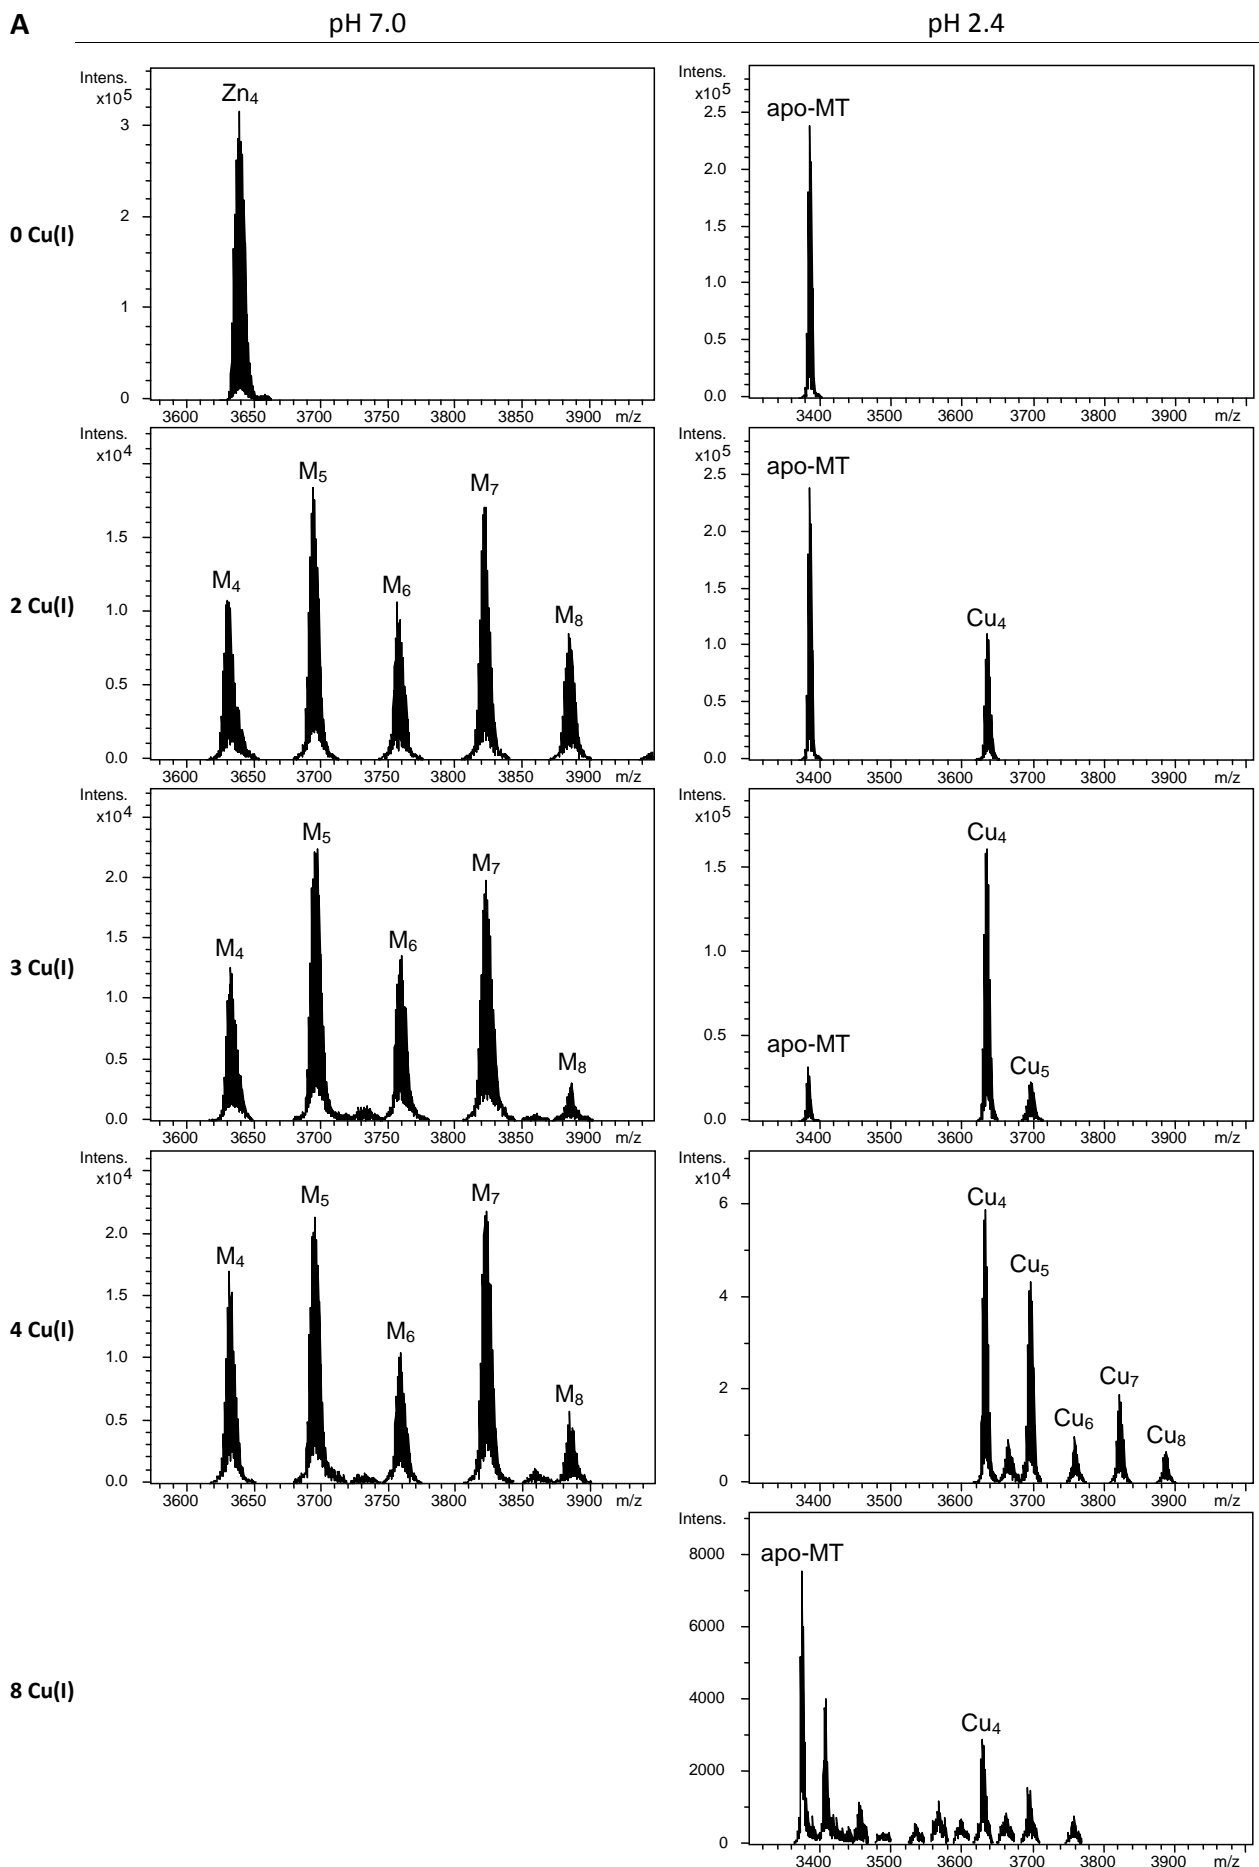

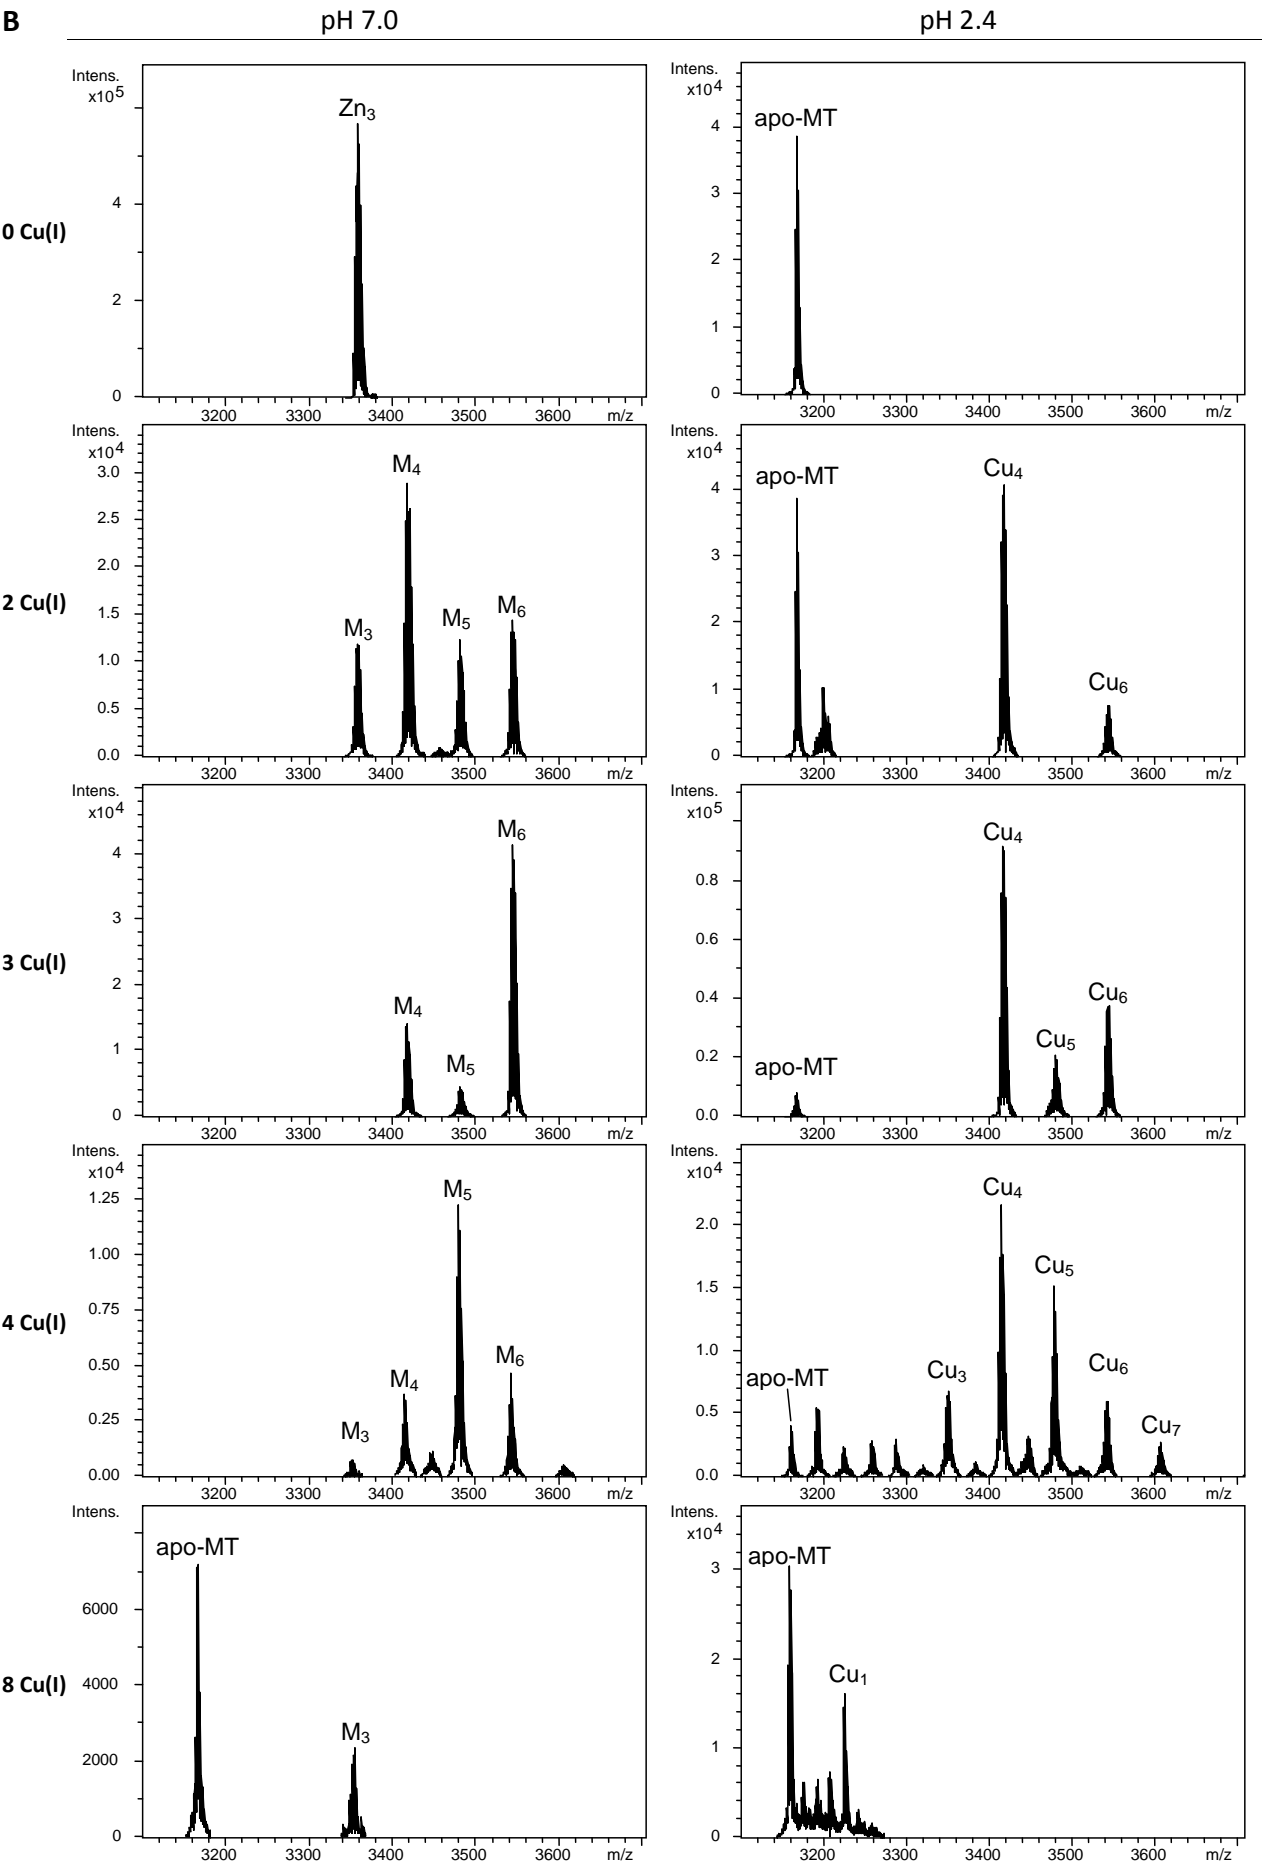

Supplement: c3mt00123g.pdf [file c3mt00123g.pdf]
